# Supplementary material for: Overcoming Current and Preventing Future Nosocomial Outbreaks during the COVID-19 Pandemic: Lessons Learned at Three Hospitals in Japan
Source: MDPI journal article supplement (doi:10.3390/ijerph181910226), 2021-09-28
Supplement: s1 [file s1]

**Table S1.** List of materials referred for three hospitals.

| Hospital | No | Type of source                             | Date published | URL                                                                                                                                                                                                                                               |
|----------|----|--------------------------------------------|----------------|---------------------------------------------------------------------------------------------------------------------------------------------------------------------------------------------------------------------------------------------------|
| A        | 1  | MOHSW cluster team' report                 | 15/4/2020      | <a href="http://www.eijuhp.com/user/media/eiju/chousa-siennhoukoku.pdf">http://www.eijuhp.com/user/media/eiju/chousa-siennhoukoku.pdf</a>                                                                                                         |
| A        | 2  | Analysis by IASR                           | 31/7/2020      | <a href="https://www.niid.go.jp/niid/ja/typhi-m/iasr-reference/2523-related-articles/related-articles-485/9759-485r06.html">https://www.niid.go.jp/niid/ja/typhi-m/iasr-reference/2523-related-articles/related-articles-485/9759-485r06.html</a> |
| A        | 3  | Staff report                               | 8/6/2020       | <a href="http://www.eijuhp.com/user/media/eiju/20200608saikainiatatte.pdf">http://www.eijuhp.com/user/media/eiju/20200608saikainiatatte.pdf</a>                                                                                                   |
| A        | 4  | Staff report                               | 8/6/2020       | <a href="https://s3-us-west-2.amazonaws.com/jnpc-prd-public-oregon/files/2020/06/2373da39-fbdb-4095-b7f1-811d3f997d2a.pdf">https://s3-us-west-2.amazonaws.com/jnpc-prd-public-oregon/files/2020/06/2373da39-fbdb-4095-b7f1-811d3f997d2a.pdf</a>   |
| A        | 5  | Staff report                               | 8/6/2020       | <a href="http://www.eijuhp.com/user/media/eiju_kenshin/layout/20200701siryoushi.pdf">http://www.eijuhp.com/user/media/eiju_kenshin/layout/20200701siryoushi.pdf</a>                                                                               |
| A        | 6  | Web newspaper                              | 1/7/2020       | <a href="https://www.asahi.com/articles/ASN716CTWN71ULBJ00B.html?iref=pc_photo_gallery_bottom">https://www.asahi.com/articles/ASN716CTWN71ULBJ00B.html?iref=pc_photo_gallery_bottom</a>                                                           |
| B        | 7  | Hospital announcement                      | 24/3/2021      | <a href="http://www.eijuhp.com/user/media/20210324kononinwofurikaerimashite..pdf">http://www.eijuhp.com/user/media/20210324kononinwofurikaerimashite..pdf</a>                                                                                     |
| A        | 8  | Hospital general information               | 22/8/2021      | <a href="http://www.eijuhp.com/floor_guide.html">http://www.eijuhp.com/floor_guide.html</a>                                                                                                                                                       |
| A        | 9  | Announcement from Keio University hospital | 1/5/2020       | <a href="http://www.hosp.keio.ac.jp/st/management/info/covid-19_info_0501.pdf">http://www.hosp.keio.ac.jp/st/management/info/covid-19_info_0501.pdf</a><br>(Reported date: 21/4/2020, 6/4/2020, 27/3/2020, 26/3/2020)                             |
| B        | 10 | Hospital general information               | -              | <a href="https://www.keiyukai-group.com/yoshihp/pamphlet/pdf/yoshidapamphlet.pdf#zoom=50">https://www.keiyukai-group.com/yoshihp/pamphlet/pdf/yoshidapamphlet.pdf#zoom=50</a>                                                                     |
| B        | 11 | Hospital general information               | -              | <a href="https://www.keiyukai-group.com/yoshihp/about/organization/">https://www.keiyukai-group.com/yoshihp/about/organization/</a>                                                                                                               |
| B        | 12 | Hospital report                            | 20/1/2021      | <a href="https://www.keiyukai-group.com/yoshihp/uploads/sites/2/2021/01/yoshida_cluster.pdf">https://www.keiyukai-group.com/yoshihp/uploads/sites/2/2021/01/yoshida_cluster.pdf</a>                                                               |
| C        | 13 | Hospital report                            | 26/2/2021      | <a href="https://www.chuobyoin.or.jp/2021/02/covid19-report20210226/">https://www.chuobyoin.or.jp/2021/02/covid19-report20210226/</a>                                                                                                             |
| C        | 14 | Hospital report                            | 29/2/2021      | <a href="https://www.chuobyoin.or.jp/2021/01/covid19-report20210129/">https://www.chuobyoin.or.jp/2021/01/covid19-report20210129/</a>                                                                                                             |
| C        | 15 | Hospital report                            | 15/1/2021      | <a href="https://www.chuobyoin.or.jp/2021/01/notice_covid19/">https://www.chuobyoin.or.jp/2021/01/notice_covid19/</a>                                                                                                                             |
| C        | 16 | Web newspaper                              | 18/1/2021      | <a href="https://www.tokyo-np.co.jp/article/80628">https://www.tokyo-np.co.jp/article/80628</a>                                                                                                                                                   |
| C        | 17 | Web newspaper                              | 21/1/2021      | <a href="https://www.asahi.com/articles/ASP1N740NP1NUTNB00S.html">https://www.asahi.com/articles/ASP1N740NP1NUTNB00S.html</a>                                                                                                                     |
| C        | 18 | Hospital Announcement                      | 28/11/2020     | <a href="https://www.chuobyoin.or.jp/2020/11/covid-19_report20201128-01/">https://www.chuobyoin.or.jp/2020/11/covid-19_report20201128-01/</a>                                                                                                     |
| C        | 19 | Hospital Announcement                      | 2/12/2020      | <a href="https://www.chuobyoin.or.jp/2020/12/covid-19_report20201128-01-2/">https://www.chuobyoin.or.jp/2020/12/covid-19_report20201128-01-2/</a>                                                                                                 |
| C        | 20 | Hospital Announcement                      | 4/12/2020      | <a href="https://www.chuobyoin.or.jp/2020/12/covid-19_report20201128-01-2-2/">https://www.chuobyoin.or.jp/2020/12/covid-19_report20201128-01-2-2/</a>                                                                                             |
| C        | 21 | Hospital Announcement                      | 10/12/2020     | <a href="https://www.chuobyoin.or.jp/2020/12/covid-19_report20201210/">https://www.chuobyoin.or.jp/2020/12/covid-19_report20201210/</a>                                                                                                           |
| C        | 22 | Hospital                                   | 19/12/2020     | <a href="https://www.chuobyoin.or.jp/2020/12/covid-">https://www.chuobyoin.or.jp/2020/12/covid-</a>                                                                                                                                               |

|   |    |              |            |                                                                                                                                                 |
|---|----|--------------|------------|-------------------------------------------------------------------------------------------------------------------------------------------------|
|   |    | Announcement | 0          | 19_report20201210-2/                                                                                                                            |
| C | 23 | Hospital     | 21/12/2020 | <a href="https://www.chuobyoin.or.jp/2020/12/covid-19_report20201221/">https://www.chuobyoin.or.jp/2020/12/covid-19_report20201221/</a>         |
|   |    | Announcement | 0          | 19_report20201221/                                                                                                                              |
| C | 24 | Hospital     | 23/12/2020 | <a href="https://www.chuobyoin.or.jp/2020/12/covid-19_report20201223/">https://www.chuobyoin.or.jp/2020/12/covid-19_report20201223/</a>         |
|   |    | Announcement | 0          | 19_report20201223/                                                                                                                              |
| C | 25 | Hospital     | 29/12/2020 | <a href="https://www.chuobyoin.or.jp/2020/12/covid-19_report20201229/">https://www.chuobyoin.or.jp/2020/12/covid-19_report20201229/</a>         |
|   |    | Announcement | 0          | 19_report20201223-2/                                                                                                                            |
| C | 26 | Hospital     | 5/1/2021   | <a href="https://www.chuobyoin.or.jp/2021/01/covid-19_report20210105/">https://www.chuobyoin.or.jp/2021/01/covid-19_report20210105/</a>         |
|   |    | Announcement |            | 19_report20210105/                                                                                                                              |
| C | 27 | Hospital     | 8/1/2021   | <a href="https://www.chuobyoin.or.jp/2021/01/covid-19_report20210108/">https://www.chuobyoin.or.jp/2021/01/covid-19_report20210108/</a>         |
|   |    | Announcement |            | 19_report20210108/                                                                                                                              |
| C | 28 | Hospital     | 19/1/2021  | <a href="https://www.chuobyoin.or.jp/2021/01/covid-19_report20210119/">https://www.chuobyoin.or.jp/2021/01/covid-19_report20210119/</a>         |
|   |    | Announcement |            | report20210119/                                                                                                                                 |
| C | 29 | Hospital     | 20/1/2021  | <a href="https://www.chuobyoin.or.jp/2021/01/covid-19_report20210120/">https://www.chuobyoin.or.jp/2021/01/covid-19_report20210120/</a>         |
|   |    | Announcement |            | report20210120/                                                                                                                                 |
| C | 30 | Hospital     | 21/1/2021  | <a href="https://www.chuobyoin.or.jp/2021/01/covid-19_report20210121-2/">https://www.chuobyoin.or.jp/2021/01/covid-19_report20210121-2/</a>     |
|   |    | Announcement |            | report20210121-2/                                                                                                                               |
| C | 31 | Hospital     | 22/1/2021  | <a href="https://www.chuobyoin.or.jp/2021/01/covid-19_report20210122/">https://www.chuobyoin.or.jp/2021/01/covid-19_report20210122/</a>         |
|   |    | Announcement |            | report20210122/                                                                                                                                 |
| C | 32 | Hospital     | 23/1/2021  | <a href="https://www.chuobyoin.or.jp/2021/01/covid-19_report20210123/">https://www.chuobyoin.or.jp/2021/01/covid-19_report20210123/</a>         |
|   |    | Announcement |            | report20210123/                                                                                                                                 |
| C | 33 | Hospital     | 25/1/2021  | <a href="https://www.chuobyoin.or.jp/2021/01/covid-19_report20210125/">https://www.chuobyoin.or.jp/2021/01/covid-19_report20210125/</a>         |
|   |    | Announcement |            | report20210125/                                                                                                                                 |
| C | 34 | Hospital     | 26/1/2021  | <a href="https://www.chuobyoin.or.jp/2021/01/covid-19_report20210126/">https://www.chuobyoin.or.jp/2021/01/covid-19_report20210126/</a>         |
|   |    | Announcement |            | report20210126/                                                                                                                                 |
| C | 35 | Hospital     | 27/1/2021  | <a href="https://www.chuobyoin.or.jp/2021/01/covid-19_report20210127/">https://www.chuobyoin.or.jp/2021/01/covid-19_report20210127/</a>         |
|   |    | Announcement |            | report20210127/                                                                                                                                 |
| C | 36 | Hospital     | 28/1/2021  | <a href="https://www.chuobyoin.or.jp/2021/01/covid-19_report20210128/">https://www.chuobyoin.or.jp/2021/01/covid-19_report20210128/</a>         |
|   |    | Announcement |            | report20210128/                                                                                                                                 |
| C | 37 | Hospital     | 29/1/2021  | <a href="https://www.chuobyoin.or.jp/2021/01/covid-19_report20210128-2/">https://www.chuobyoin.or.jp/2021/01/covid-19_report20210128-2/</a>     |
|   |    | Announcement |            | report20210128-2/                                                                                                                               |
| C | 38 | Hospital     | 29/1/2021  | <a href="https://www.chuobyoin.or.jp/2021/01/covid19_report20210129/">https://www.chuobyoin.or.jp/2021/01/covid19_report20210129/</a>           |
|   |    | Announcement |            | report20210129/                                                                                                                                 |
| C | 39 | Hospital     | 30/1/2021  | <a href="https://www.chuobyoin.or.jp/2021/01/covid-19_report20210128-2-2/">https://www.chuobyoin.or.jp/2021/01/covid-19_report20210128-2-2/</a> |
|   |    | Announcement |            | report20210128-2-2/                                                                                                                             |
| C | 40 | Hospital     | 1/2/2021   | <a href="https://www.chuobyoin.or.jp/2021/02/covid-19_report20210201/">https://www.chuobyoin.or.jp/2021/02/covid-19_report20210201/</a>         |
|   |    | Announcement |            | report20210201/                                                                                                                                 |
| C | 41 | Hospital     | 2/2/2021   | <a href="https://www.chuobyoin.or.jp/2021/02/covid-19_report20210202/">https://www.chuobyoin.or.jp/2021/02/covid-19_report20210202/</a>         |
|   |    | Announcement |            | report20210202/                                                                                                                                 |
| C | 42 | Hospital     | 3/2/2021   | <a href="https://www.chuobyoin.or.jp/2021/02/covid-19_report20210203/">https://www.chuobyoin.or.jp/2021/02/covid-19_report20210203/</a>         |
|   |    | Announcement |            | report20210203/                                                                                                                                 |
| C | 43 | Hospital     | 4/2/2021   | <a href="https://www.chuobyoin.or.jp/2021/02/covid-19_report20210204/">https://www.chuobyoin.or.jp/2021/02/covid-19_report20210204/</a>         |
|   |    | Announcement |            | report20210204/                                                                                                                                 |
| C | 44 | Hospital     | 5/2/2021   | <a href="https://www.chuobyoin.or.jp/2021/02/covid-19_report20210205/">https://www.chuobyoin.or.jp/2021/02/covid-19_report20210205/</a>         |
|   |    | Announcement |            | report20210205/                                                                                                                                 |
| C | 45 | Hospital     | 6/2/2021   | <a href="https://www.chuobyoin.or.jp/2021/02/covid-19_report20210206/">https://www.chuobyoin.or.jp/2021/02/covid-19_report20210206/</a>         |
|   |    | Announcement |            | report20210206/                                                                                                                                 |
| C | 46 | Hospital     | 8/2/2021   | <a href="https://www.chuobyoin.or.jp/2021/02/covid-19_report20210208/">https://www.chuobyoin.or.jp/2021/02/covid-19_report20210208/</a>         |
|   |    | Announcement |            | report20210208/                                                                                                                                 |
| C | 47 | Hospital     | 8/2/2021   | <a href="https://www.chuobyoin.or.jp/2021/02/medical-care20210208/">https://www.chuobyoin.or.jp/2021/02/medical-care20210208/</a>               |
|   |    | Announcement |            | care20210208/                                                                                                                                   |

|   |    |                          |           |                                                                                                                                                   |
|---|----|--------------------------|-----------|---------------------------------------------------------------------------------------------------------------------------------------------------|
| C | 48 | Hospital<br>Announcement | 9/2/2021  | <a href="https://www.chuobyoin.or.jp/2021/02/covid-19-report20210209/">https://www.chuobyoin.or.jp/2021/02/covid-19-report20210209/</a>           |
| C | 49 | Hospital<br>Announcement | 10/2/2021 | <a href="https://www.chuobyoin.or.jp/2021/02/covid-19-report20210210/">https://www.chuobyoin.or.jp/2021/02/covid-19-report20210210/</a>           |
| C | 50 | Hospital<br>Announcement | 12/2/2021 | <a href="https://www.chuobyoin.or.jp/2021/02/covid-19-report20210212/">https://www.chuobyoin.or.jp/2021/02/covid-19-report20210212/</a>           |
| C | 51 | Hospital<br>Announcement | 13/2/2021 | <a href="https://www.chuobyoin.or.jp/2021/02/covid-19-report20210212-2/">https://www.chuobyoin.or.jp/2021/02/covid-19-report20210212-2/</a>       |
| C | 52 | Hospital<br>Announcement | 15/2/2021 | <a href="https://www.chuobyoin.or.jp/2021/02/covid-19-report20210215/">https://www.chuobyoin.or.jp/2021/02/covid-19-report20210215/</a>           |
| C | 53 | Hospital<br>Announcement | 16/2/2021 | <a href="https://www.chuobyoin.or.jp/2021/02/covid-19-report20210216/">https://www.chuobyoin.or.jp/2021/02/covid-19-report20210216/</a>           |
| C | 54 | Hospital<br>Announcement | 17/2/2021 | <a href="https://www.chuobyoin.or.jp/2021/02/covid-19-report20210217/">https://www.chuobyoin.or.jp/2021/02/covid-19-report20210217/</a>           |
| C | 55 | Hospital<br>Announcement | 18/2/2021 | <a href="https://www.chuobyoin.or.jp/2021/02/covid-19-report20210218/">https://www.chuobyoin.or.jp/2021/02/covid-19-report20210218/</a>           |
| C | 56 | Hospital<br>Announcement | 19/2/2021 | <a href="https://www.chuobyoin.or.jp/2021/02/covid-19-report20210219/">https://www.chuobyoin.or.jp/2021/02/covid-19-report20210219/</a>           |
| C | 57 | Hospital<br>Announcement | 20/2/2021 | <a href="https://www.chuobyoin.or.jp/2021/02/covid-19-report20210220/">https://www.chuobyoin.or.jp/2021/02/covid-19-report20210220/</a>           |
| C | 58 | Hospital<br>Announcement | 22/2/2021 | <a href="https://www.chuobyoin.or.jp/2021/02/covid-19-report20210222/">https://www.chuobyoin.or.jp/2021/02/covid-19-report20210222/</a>           |
| C | 59 | Hospital<br>Announcement | 24/2/2021 | <a href="https://www.chuobyoin.or.jp/2021/02/covid-19-report20210224/">https://www.chuobyoin.or.jp/2021/02/covid-19-report20210224/</a>           |
| C | 60 | Hospital<br>Announcement | 25/2/2021 | <a href="https://www.chuobyoin.or.jp/2021/02/covid-19-report20210225/">https://www.chuobyoin.or.jp/2021/02/covid-19-report20210225/</a>           |
| C | 61 | Hospital<br>Announcement | 26/2/2021 | <a href="https://www.chuobyoin.or.jp/2021/02/covid19-report20210226/">https://www.chuobyoin.or.jp/2021/02/covid19-report20210226/</a>             |
| C | 62 | Hospital<br>Announcement | 1/3/2021  | <a href="https://www.chuobyoin.or.jp/2021/03/infection-prevention20210311/">https://www.chuobyoin.or.jp/2021/03/infection-prevention20210311/</a> |
| C | 63 | Hospital<br>Announcement | -         | <a href="https://www.chuobyoin.or.jp/hospitalization/visitor/">https://www.chuobyoin.or.jp/hospitalization/visitor/</a>                           |
| C | 64 | Hospital map             | -         | <a href="https://www.chuobyoin.or.jp/floormap/all/">https://www.chuobyoin.or.jp/floormap/all/</a>                                                 |
| C | 65 | Hospital<br>information  | general - | <a href="https://www.chuobyoin.or.jp/department/index/list/">https://www.chuobyoin.or.jp/department/index/list/</a>                               |

---
